# Supplementary material for: Radiomics for Tumor Characterization in Breast Cancer Patients: A Feasibility Study Comparing Contrast-Enhanced Mammography and Magnetic Resonance Imaging
Source: PubMed Central journal article supplement (PMC7400681; doi:10.3390/diagnostics10070492), 2020-07-18
Supplement: diagnostics-10-00492-s001.pdf [file diagnostics-10-00492-s001.pdf]

## Supplementary Material

**Table S1:** Radiomic features from different categories

| <b>Lesion Geometry (GEO)</b>                                                                 | <b>First-Order Histogram (HIS)</b>                                                                                                                                                                                                                          | <b>Absolute Gradient (GRA)</b>                                                                                                                                              | <b>Run-Length Matrix (RLM)</b>                                                                                                                                                                                   | <b>Co-Occurrence Matrix (COM)</b>                                                                                                                                                                                                                                                                                                         | <b>Autoregressive Model (ARM)</b>                                                                                                 | <b>Wavelet Transform (WAV)</b>                                     |
|----------------------------------------------------------------------------------------------|-------------------------------------------------------------------------------------------------------------------------------------------------------------------------------------------------------------------------------------------------------------|-----------------------------------------------------------------------------------------------------------------------------------------------------------------------------|------------------------------------------------------------------------------------------------------------------------------------------------------------------------------------------------------------------|-------------------------------------------------------------------------------------------------------------------------------------------------------------------------------------------------------------------------------------------------------------------------------------------------------------------------------------------|-----------------------------------------------------------------------------------------------------------------------------------|--------------------------------------------------------------------|
| <ul style="list-style-type: none"> <li>• Total number of geometric parameters: 73</li> </ul> | <ul style="list-style-type: none"> <li>• mean</li> <li>• variance</li> <li>• skewness</li> <li>• kurtosis,</li> <li>• 1-% percentile</li> <li>• 10-% percentile</li> <li>• 50-% percentile</li> <li>• 90-% percentile</li> <li>• 99-% percentile</li> </ul> | <ul style="list-style-type: none"> <li>• mean</li> <li>• variance</li> <li>• skewness</li> <li>• kurtosis</li> <li>• percentage of pixels with nonzero gradient.</li> </ul> | <ul style="list-style-type: none"> <li>• run length nonuniformity</li> <li>• grey level nonuniformity</li> <li>• long run emphasis</li> <li>• short run emphasis</li> <li>• fraction of image in runs</li> </ul> | <ul style="list-style-type: none"> <li>• angular second moment</li> <li>• contrast</li> <li>• correlation</li> <li>• sum of squares</li> <li>• inverse difference moment</li> <li>• sum average</li> <li>• sum variance</li> <li>• sum entropy</li> <li>• entropy</li> <li>• difference variance</li> <li>• difference entropy</li> </ul> | <ul style="list-style-type: none"> <li>• teta 1</li> <li>• teta 2</li> <li>• teta 3</li> <li>• teta 4</li> <li>• sigma</li> </ul> | <ul style="list-style-type: none"> <li>• WAVELET ENERGY</li> </ul> |

For further information on the features visit: <http://www.eletel.p.lodz.pl/programy/mazda/download/FeaturerList.pdf>
